# Supplementary material for: Differential controls on soil carbon density and mineralization among contrasting forest types in a temperate forest ecosystem
Source: PubMed Central journal article supplement (PMC4772072; doi:10.1038/srep22411), 2016-03-01

## Supplementary Figures S1-S4

### **Title: Differential controls on soil carbon density and mineralization among contrasting forest types in a temperate forest ecosystem**

*Authors: Yeming You<sup>1,2,3\*</sup>, Juan Wang<sup>1,2\*</sup>, Xiaolu Sun<sup>1,2</sup>, Zuoxin Tang<sup>1,2</sup>, Zhiyong Zhou<sup>1,2</sup>, Osbert Jianxin Sun<sup>1,2</sup>*

<sup>1</sup>College of Forest Science, Beijing Forestry University, Beijing 100083, China, <sup>2</sup>Institute of Forestry and Climate Change Research, Beijing Forestry University, Beijing 100083, China, <sup>3</sup>College of Forestry, Guangxi University, Nanning, Guangxi 530004, China.

*Author for correspondence:*

*Osbert Jianxin Sun*

*Tel: +86 10 62337095*

*Email: sunjianx@bjfu.edu.cn*

*\*These authors contributed equally to this work.*

**Figure S1** Mean values of microbial biomass N (MBN) and microbial C to N ratio ( $C/N_{mic}$ ) in 0-5, 5-10, 10-20 cm soil layers in plots of contrasting stand age classes of *Q. aliena* forest during the growing seasons from 2011 to 2012. Error bars represent 1 SE ( $n = 3$ ). Same letters above the error bars indicate no significant differences among stand age classes within given soil layers ( $P > 0.05$ ).

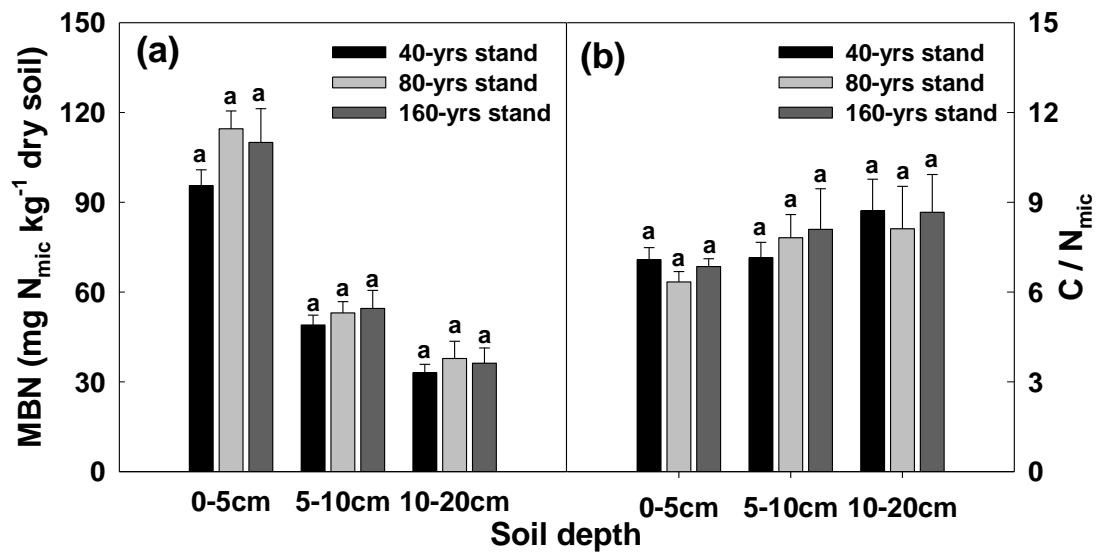

**Figure S2** Mean values of soil microbial respiration (MR) and microbial metabolic quotient ( $qCO_2$ ) in the 0-5, 5-10 and 10-20 cm soil layers in plots of contrasting stand age classes of *Q. aliena* forest during the growing seasons from 2011 to 2012. Error bars represent 1 SE ( $n = 3$ ). Same letters above the error bars indicate no significant differences among stand age classes within given soil layers ( $P > 0.05$ ).

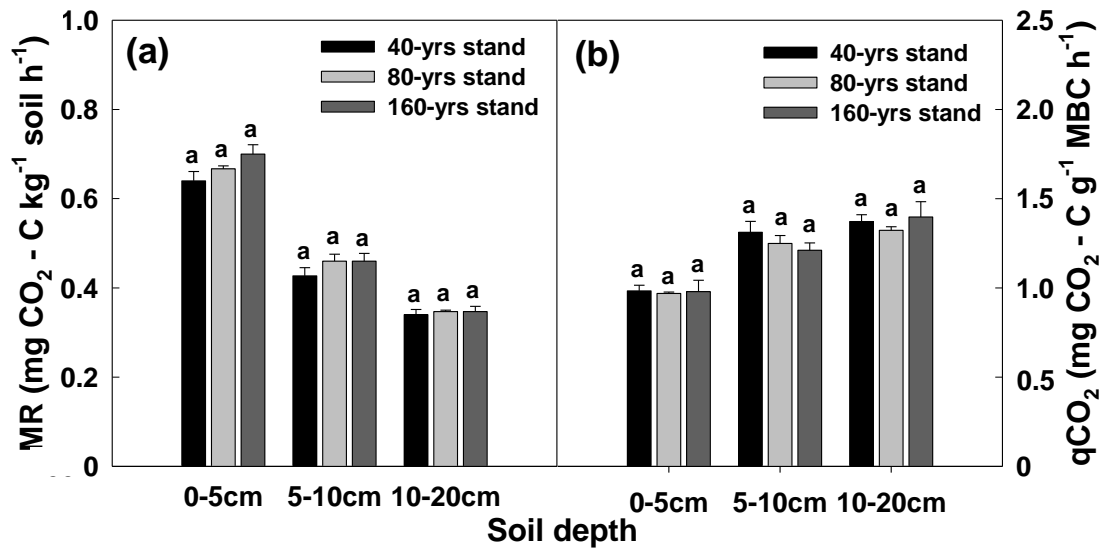

**Figure S3** Mean values of activities of  $\beta$ -1,4-glucosidase (BG),  $\beta$ -1,4-N-acetylglucosaminidase (NAG), phenol oxidase (PO) and peroxidase (PER) in the 0-5, 5-10, 10-20 cm soil layers in plots of contrasting stand age classes of *Q. aliena* forest during the growing seasons from 2011 to 2012. Error bars represent 1 SE (n = 3). Different letters above the error bars indicate significant differences among stand age classes within given soil layers ( $P < 0.05$ ).

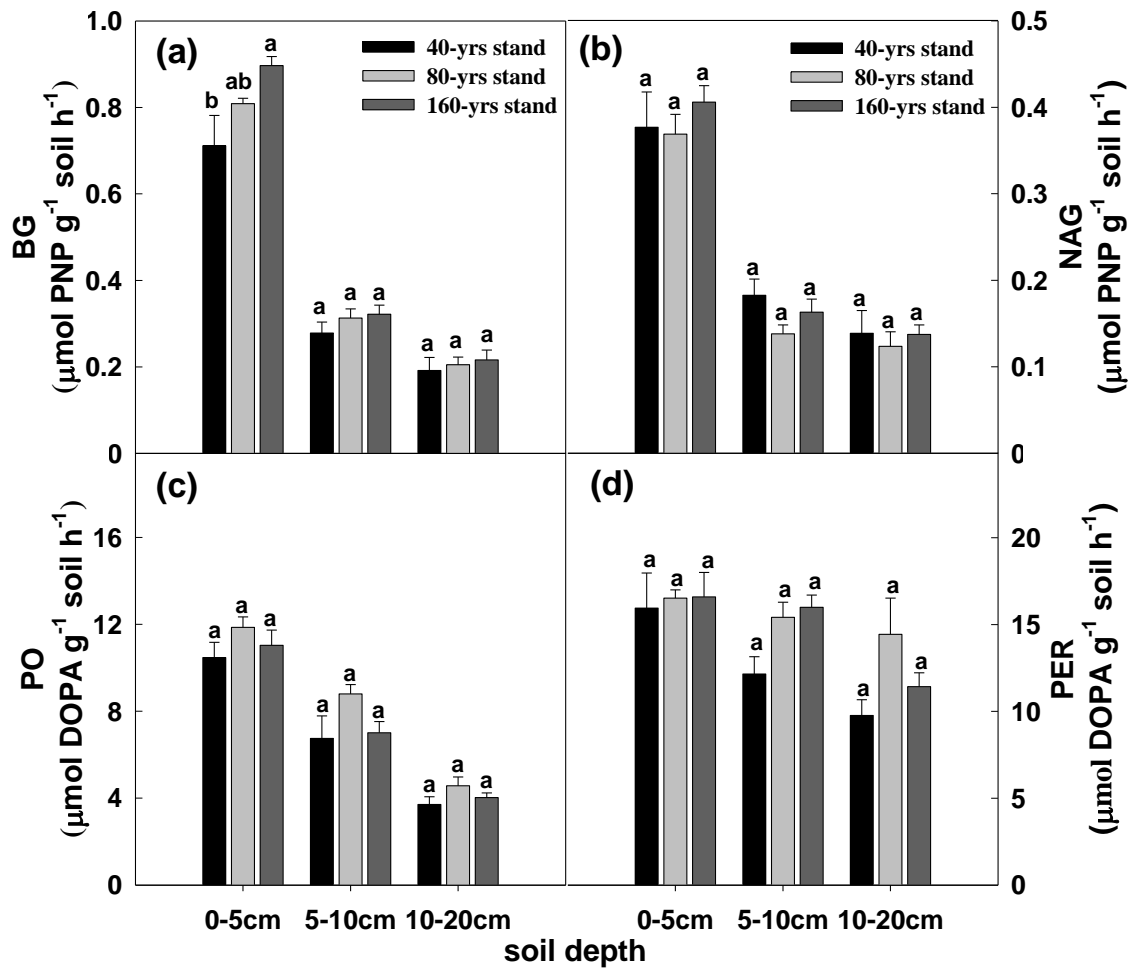

**Figure S4** Mean values of specific activities of  $\beta$ -1,4-glucosidase (BG),  $\beta$ -1,4-N-acetylglucosaminidase (NAG), phenol oxidase (PO) and peroxidase (PER) in the 0-5, 5-10, 10-20 cm soil layers in plots of contrasting stand age classes of *Q. aliena* forest during the growing seasons from 2011 to 2012. Error bars represent 1 SE (n = 3). Same letters above the error bars indicate no significant differences among stand age classes within given soil layers ( $P > 0.05$ ).

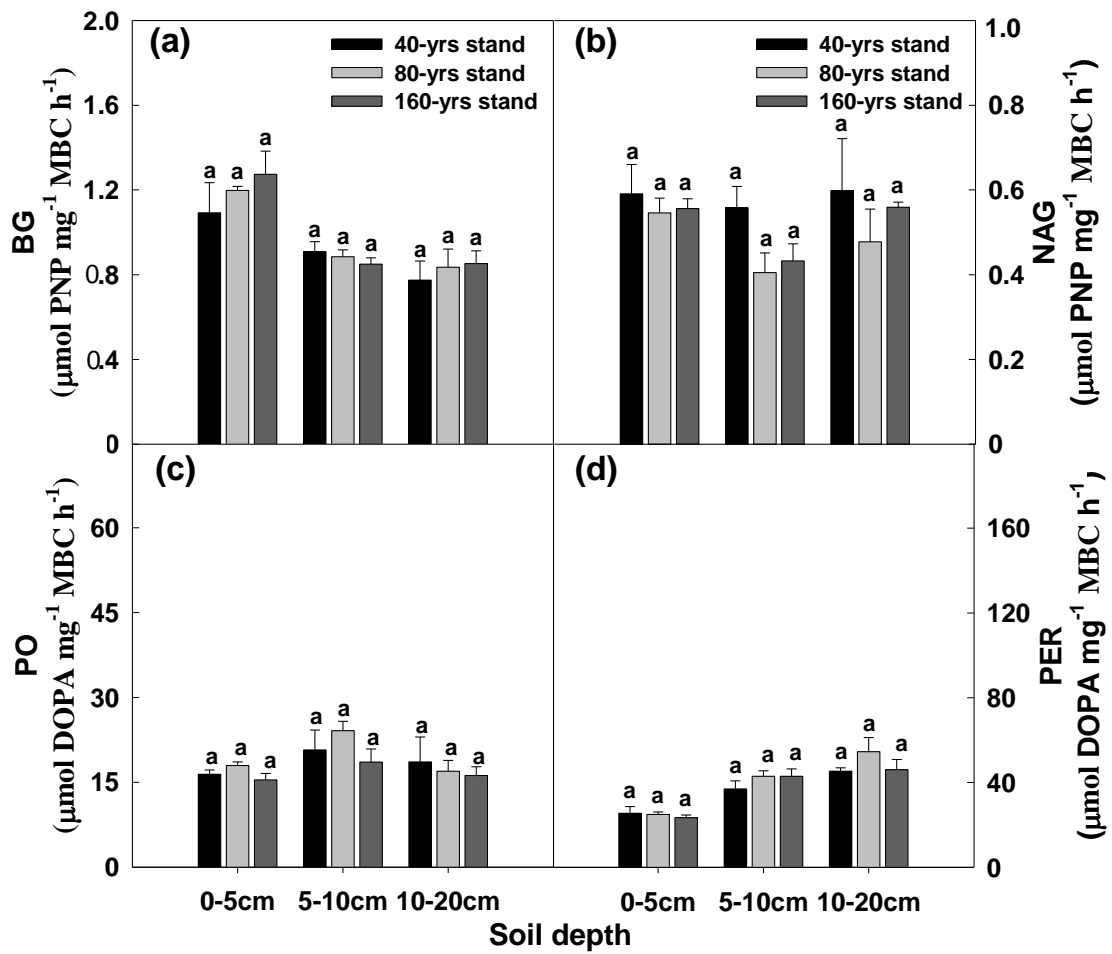

Supplement: srep22411-s2.pdf [file srep22411-s2.pdf]
