# Supplementary material for: Differential controls on soil carbon density and mineralization among contrasting forest types in a temperate forest ecosystem
Source: PubMed Central journal article supplement (PMC4772072; doi:10.1038/srep22411), 2016-03-01
Supplement: srep22411-s1.pdf [file srep22411-s1.pdf]

## Supplementary Tables S1-S8

### **Title: Differential controls on soil carbon density and mineralization among contrasting forest types in a temperate forest ecosystem**

*Authors: Yeming You<sup>1,2,3\*</sup>, Juan Wang<sup>1,2\*</sup>, Xiaolu Sun<sup>1,2</sup>, Zuoxin Tang<sup>1,2</sup>, Zhiyong Zhou<sup>1,2</sup>, Osbert Jianxin Sun<sup>1,2</sup>*

<sup>1</sup>College of Forest Science, Beijing Forestry University, Beijing 100083, China, <sup>2</sup>Institute of Forestry and Climate Change Research, Beijing Forestry University, Beijing 100083, China, <sup>3</sup>College of Forestry, Guangxi University, Nanning, Guangxi 530004, China.

*Author for correspondence:*

*Osbert Jianxin Sun*

*Tel: +86 10 62337095*

*Email: sunjianx@bjfu.edu.cn*

*\*These authors contributed equally to this work.*

**Table S1** Summary of *F*-values and significance level in analysis of variance (ANOVA) evaluating the effects of forest type/stand age class on plant, site and soil variables within given soil layers (Forest type: d.f. = 3, 8; Stand age class: d.f. = 2, 6).

|                                                               | FR       | %SWC | %Sand | %Silt | %Clay | TN <sub>soil</sub> | NH <sub>4</sub> -N | NO <sub>3</sub> -N | pH       | C/N <sub>soil</sub> | DOC   |
|---------------------------------------------------------------|----------|------|-------|-------|-------|--------------------|--------------------|--------------------|----------|---------------------|-------|
| Comparison among forest types                                 |          |      |       |       |       |                    |                    |                    |          |                     |       |
| 0-5 cm                                                        | 28.35*** | 3.00 | 3.23  | 2.98  | 4.04  | 4.42*              | 0.72               | 4.49*              | 8.20**   | 12.63**             | 4.41* |
| 5-10 cm                                                       | 0.56     | 2.94 | 6.22* | 3.00  | 7.03* | 7.85**             | 2.33               | 1.52               | 12.03**  | 3.01                | 1.30  |
| 10-20 cm                                                      | 7.59*    | 2.8  | 5.75* | 3.10  | 4.92* | 9.26**             | 1.23               | 6.28*              | 23.95*** | 13.74**             | 0.90  |
| Comparison among stand age classes of <i>Q. aliena</i> forest |          |      |       |       |       |                    |                    |                    |          |                     |       |
| 0-5 cm                                                        | 1.61     | 4.81 | 1.11  | 1.52  | 0.60  | 7.77*              | 2.59               | 1.69               | 0.38     | 0.21                | 0.22  |
| 5-10 cm                                                       | 0.32     | 1.47 | 0.95  | 0.12  | 1.47  | 0.15               | 0.14               | 0.05               | 0.96     | 0.50                | 0.08  |
| 10-20 cm                                                      | 1.04     | 2.05 | 1.76  | 0.09  | 1.20  | 1.08               | 0.42               | 1.99               | 3.16     | 0.46                | 0.35  |

Note: \* $P < 0.05$ ; \*\* $P < 0.01$ ; \*\*\* $P < 0.001$ .FR, fine root mass; %SWC, gravimetric soil water content (w/w); %Sand, percentage of sand; %Silt, percentage of silt; %Clay, percentage of clay;

TN<sub>soil</sub>, soil total nitrogen; NH<sub>4</sub>-N, ammonium nitrogen; NO<sub>3</sub>-N, nitrate nitrogen; pH, soil pH value; C/N<sub>soil</sub>, soil carbon to nitrogen ratio; DOC, dissolved organic carbon.

**Table S2** Values of site, microclimatic and plant variables for comparison among contrasting forest types (means  $\pm$  standard errors; n = 3).

|                            | Forest types         |                                          |                        |                      | ANOVA    |          |
|----------------------------|----------------------|------------------------------------------|------------------------|----------------------|----------|----------|
|                            | <i>Q. aliena</i>     | <i>P. armandii</i> /<br><i>Q. aliena</i> | <i>Q. glandulifera</i> | <i>Q. variabilis</i> | <i>F</i> | <i>P</i> |
| BA                         | 42.1 $\pm$ 3.7a      | 43.9 $\pm$ 4.2a                          | 44.8 $\pm$ 4.1a        | 48.0 $\pm$ 2.6a      | 0.45     | 0.725    |
| Slope (%)                  | 41.1 $\pm$ 3.0a      | 15.0 $\pm$ 10.7b                         | 24.6 $\pm$ 8.0ab       | 25.6 $\pm$ 2.2ab     | 2.43     | 0.140    |
| T <sub>soil10</sub> (°C)   | 11.4 $\pm$ 0.4bc     | 11.1 $\pm$ 0.3c                          | 12.0 $\pm$ 0.1b        | 13.1 $\pm$ 0.1a      | 13.79    | 0.002    |
| Litter <sub>mass</sub>     | 4563.6 $\pm$ 569.3ab | 5133.7 $\pm$ 503.0a                      | 3956.6 $\pm$ 663.6ab   | 3012.6 $\pm$ 432.8b  | 2.73     | 0.114    |
| Litter <sub>fall</sub>     | 687.1 $\pm$ 13.9a    | 514.9 $\pm$ 46.7b                        | 382.5 $\pm$ 16.0c      | 456.6 $\pm$ 9.8c     | 24.73    | < 0.001  |
| %N <sub>litter</sub>       | 1.4 $\pm$ 0.1a       | 1.1 $\pm$ 0.1b                           | 1.1 $\pm$ 0.1b         | 0.9 $\pm$ 0.0b       | 7.56     | 0.010    |
| C/N <sub>litter</sub>      | 35.3 $\pm$ 0.5b      | 47.8 $\pm$ 5.3a                          | 45.5 $\pm$ 5.4ab       | 53.3 $\pm$ 5.3a      | 4.39     | 0.042    |
| %Lignin <sub>litter</sub>  | 29.1 $\pm$ 2.8a      | 28.8 $\pm$ 4.8a                          | 28.0 $\pm$ 3.4a        | 25.3 $\pm$ 0.6a      | 0.37     | 0.775    |
| Lignin/N <sub>litter</sub> | 20.9 $\pm$ 1.7b      | 24.9 $\pm$ 2.4ab                         | 26.6 $\pm$ 0.6a        | 27.9 $\pm$ 2.0a      | 4.43     | 0.041    |
| %Lignin <sub>root</sub>    | 21.5 $\pm$ 0.2b      | 44.0 $\pm$ 4.6a                          | 34.2 $\pm$ 1.1ab       | 28.8 $\pm$ 5.3b      | 7.2      | 0.011    |
| Lignin/N <sub>root</sub>   | 30.8 $\pm$ 4.7b      | 58.5 $\pm$ 5.2a                          | 45.9 $\pm$ 1.7ab       | 34.6 $\pm$ 8.1b      | 5.29     | 0.027    |
| C/N <sub>root</sub>        | 70.2 $\pm$ 3.9a      | 58.7 $\pm$ 3.2a                          | 67.3 $\pm$ 5.4a        | 71.2 $\pm$ 5.1a      | 1.7      | 0.244    |

Values designated by different letters for a given variable are significantly different among forest types ( $P < 0.05$ ). BA, stem basal area ( $\text{m}^2 \text{ha}^{-1}$ ); Slope, site slope; T<sub>soil10</sub>, soil temperature at 10 cm depth; Litter<sub>mass</sub>, forest floor litter mass ( $\text{g m}^{-2}$ ); Litter<sub>fall</sub>, annual litterfall ( $\text{g m}^{-2} \text{yr}^{-1}$ ); %C<sub>litter</sub>, litter carbon content in percentage; %N<sub>litter</sub>, litter nitrogen content in percentage; C/N<sub>litter</sub>, litter carbon to nitrogen ratio; %Lignin<sub>litter</sub>, litter lignin content in percentage; Lignin/N<sub>litter</sub>, litter lignin to nitrogen ratio; %Lignin<sub>root</sub>, root lignin content in percentage; Lignin/N<sub>root</sub>, root lignin to nitrogen ratio; C/N<sub>root</sub>, root carbon to nitrogen ratio.

**Table S3** Values of plant, microclimatic and soil variables for comparison among contrasting forest types (means  $\pm$  standard errors; n = 3).

|                     | 0 – 5 cm soil layer |                                          |                        |                      | 5 – 10 cm soil layer |                                          |                        |                      | 10 – 20 cm soil layer |                                          |                        |                      |
|---------------------|---------------------|------------------------------------------|------------------------|----------------------|----------------------|------------------------------------------|------------------------|----------------------|-----------------------|------------------------------------------|------------------------|----------------------|
|                     | <i>Q. aliena</i>    | <i>P. armandii</i> /<br><i>Q. aliena</i> | <i>Q. glandulifera</i> | <i>Q. variabilis</i> | <i>Q. aliena</i>     | <i>P. armandii</i> /<br><i>Q. aliena</i> | <i>Q. glandulifera</i> | <i>Q. variabilis</i> | <i>Q. aliena</i>      | <i>P. armandii</i> /<br><i>Q. aliena</i> | <i>Q. glandulifera</i> | <i>Q. variabilis</i> |
| FR                  | 3.7 $\pm$ 0.5bc     | 2.7 $\pm$ 0.2c                           | 4.15 $\pm$ 0.3b        | 5.5 $\pm$ 0.2a       | 2.9 $\pm$ 0.5a       | 3.1 $\pm$ 0.7a                           | 3.5 $\pm$ 0.3a         | 3.4 $\pm$ 0.4a       | 1.5 $\pm$ 0.1a        | 1.0 $\pm$ 0.1b                           | 1.7 $\pm$ 0.1a         | 1.8 $\pm$ 0.1a       |
| %SWC                | 38.5 $\pm$ 2.7ab    | 42.8 $\pm$ 10.1a                         | 37.0 $\pm$ 2.0ab       | 21.6 $\pm$ 0.4b      | 31.3 $\pm$ 2.7a      | 32.9 $\pm$ 9.0a                          | 28.2 $\pm$ 1.8ab       | 14.8 $\pm$ 0.1 b     | 28.4 $\pm$ 2.3ab      | 30.7 $\pm$ 8.1a                          | 25.5 $\pm$ 2.4ab       | 14.1 $\pm$ 0.3b      |
| %Sand               | 61.7 $\pm$ 3.8b     | 63.0 $\pm$ 7.8b                          | 62.3 $\pm$ 1.9b        | 78.3 $\pm$ 0.7a      | 68.7 $\pm$ 4.5b      | 69.3 $\pm$ 5.5ab                         | 57.7 $\pm$ 0.7b        | 79.3 $\pm$ 0.3a      | 64.3 $\pm$ 0.9b       | 74.0 $\pm$ 5.5ab                         | 65.3 $\pm$ 1.7b        | 79.0 $\pm$ 0.6a      |
| %Silt               | 10.7 $\pm$ 1.7ab    | 9.0 $\pm$ 1.5b                           | 13.7 $\pm$ 0.3a        | 8.7 $\pm$ 1.3b       | 11.3 $\pm$ 2.3ab     | 8.0 $\pm$ 1.0b                           | 13.7 $\pm$ 1.5a        | 9.0 $\pm$ 0.0ab      | 11.4 $\pm$ 1.5a       | 6.7 $\pm$ 1.2b                           | 10.0 $\pm$ 1.0ab       | 9.7 $\pm$ 0.7ab      |
| %Clay               | 27.6 $\pm$ 2.2a     | 28.0 $\pm$ 6.4a                          | 24.0 $\pm$ 1.5ab       | 13.0 $\pm$ 1.2b      | 20.0 $\pm$ 2.3ab     | 22.7 $\pm$ 4.5a                          | 28.6 $\pm$ 1.7a        | 11.7 $\pm$ 0.3b      | 24.3 $\pm$ 2.2a       | 19.3 $\pm$ 4.8ab                         | 24.7 $\pm$ 1.9a        | 11.3 $\pm$ 0.3b      |
| TN <sub>soil</sub>  | 4.69 $\pm$ 0.1a     | 3.51 $\pm$ 1.2ab                         | 2.69 $\pm$ 0.2b        | 2.37 $\pm$ 0.1b      | 2.41 $\pm$ 0.2a      | 1.51 $\pm$ 0.3b                          | 1.57 $\pm$ 0.2b        | 1.00 $\pm$ 0.0b      | 1.99 $\pm$ 0.1a       | 1.15 $\pm$ 0.3b                          | 0.94 $\pm$ 0.0b        | 0.70 $\pm$ 0.0b      |
| NH <sub>4</sub> -N  | 48.5 $\pm$ 3.6a     | 49.1 $\pm$ 11.5a                         | 49.3 $\pm$ 6.2a        | 39.6 $\pm$ 0.9a      | 31.3 $\pm$ 3.1a      | 34.3 $\pm$ 8.1a                          | 34.0 $\pm$ 0.7a        | 20.2 $\pm$ 0.3a      | 24.4 $\pm$ 2.9a       | 27.4 $\pm$ 8.1a                          | 21.0 $\pm$ 1.4a        | 16.1 $\pm$ 0.1a      |
| NO <sub>3</sub> -N  | 2.6 $\pm$ 0.4ab     | 2.9 $\pm$ 1.1a                           | 1.0 $\pm$ 0.1c         | 1.2 $\pm$ 0.2bc      | 1.7 $\pm$ 0.6a       | 2.2 $\pm$ 0.9a                           | 0.9 $\pm$ 0.1a         | 0.9 $\pm$ 0.1a       | 1.7 $\pm$ 0.1a        | 1.8 $\pm$ 0.4a                           | 0.9 $\pm$ 0.1b         | 0.8 $\pm$ 0.0b       |
| pH                  | 4.6 $\pm$ 0.1a      | 4.6 $\pm$ 0.1a                           | 4.2 $\pm$ 0.1b         | 4.2 $\pm$ 0.0b       | 4.5 $\pm$ 0.1 a      | 4.5 $\pm$ 0.1a                           | 4.2 $\pm$ 0.0b         | 4.2 $\pm$ 0.0b       | 4.6 $\pm$ 0.0a        | 4.6 $\pm$ 0.0a                           | 4.3 $\pm$ 0.1b         | 4.3 $\pm$ 0.0b       |
| C/N <sub>soil</sub> | 13.5 $\pm$ 0.3c     | 15.5 $\pm$ 0.8b                          | 17.4 $\pm$ 0.6a        | 17.7 $\pm$ 0.2a      | 13.9 $\pm$ 0.2b      | 15.8 $\pm$ 1.0a                          | 15.3 $\pm$ 0.2ab       | 16.1 $\pm$ 0.6a      | 13.8 $\pm$ 0.6b       | 14.9 $\pm$ 0.2b                          | 16.0 $\pm$ 0.4ab       | 16.5 $\pm$ 0.6a      |
| DOC                 | 149.0 $\pm$ 22.8b   | 198.7 $\pm$ 11.4ab                       | 254.9 $\pm$ 27.6a      | 190.1 $\pm$ 17.7ab   | 157.7 $\pm$ 17.3a    | 177.1 $\pm$ 5.7a                         | 216.0 $\pm$ 16.9a      | 183.6 $\pm$ 34.6a    | 144.7 $\pm$ 17.7a     | 153.4 $\pm$ 20.6a                        | 183.6 $\pm$ 28.3a      | 179.3 $\pm$ 9.4a     |

Values designated by different letters for a given variable are significantly different among forest types within given soil layers ( $P < 0.05$ ). FR, fine root mass ( $\text{g kg}^{-1}$  soil); %SWC, gravimetric soil water content (w/w); %Sand, percentage of sand; %Silt, percentage of silt; %Clay, percentage of clay; TN<sub>soil</sub>, soil total nitrogen ( $\text{g kg}^{-1}$  soil); NH<sub>4</sub>-N, ammonium nitrogen ( $\text{mg kg}^{-1}$  soil); NO<sub>3</sub>-N, nitrate nitrogen ( $\text{mg kg}^{-1}$  soil); pH, soil pH value; C/N<sub>soil</sub>, soil carbon to nitrogen ratio; DOC, dissolved organic carbon ( $\text{mg kg}^{-1}$  soil).

**Table S4** Values of microclimatic and plant variables and summary of ANOVA for comparison among contrasting stand age classes of the *Q. aliena* forest (means  $\pm$  standard errors; n = 3).

|                            | Stand age class     |                     |                     | ANOVA    |          |
|----------------------------|---------------------|---------------------|---------------------|----------|----------|
|                            | 40-yrs stand        | 80-yrs stand        | 160-yrs stand       | <i>F</i> | <i>P</i> |
| BA                         | 44.6 $\pm$ 3.8a     | 42.1 $\pm$ 3.7a     | 46.8 $\pm$ 2.6a     | 0.47     | 0.645    |
| Slope (%)                  | 42.9 $\pm$ 8.1a     | 41.1 $\pm$ 3.0a     | 40.5 $\pm$ 3.1a     | 0.06     | 0.944    |
| T <sub>soil10</sub> (°C)   | 11.8 $\pm$ 0.1a     | 11.4 $\pm$ 0.4a     | 11.1 $\pm$ 0.1a     | 2.22     | 0.190    |
| Litter <sub>mass</sub>     | 5534.8 $\pm$ 759.4a | 4563.6 $\pm$ 569.3a | 5753.9 $\pm$ 566.5a | 0.99     | 0.426    |
| Litter <sub>fall</sub>     | 655.5 $\pm$ 183.7a  | 687.1 $\pm$ 13.9a   | 627.9 $\pm$ 61.2a   | 0.07     | 0.933    |
| %N <sub>litter</sub>       | 1.3 $\pm$ 0.1a      | 1.4 $\pm$ 0.1a      | 1.4 $\pm$ 0.1a      | 0.32     | 0.740    |
| C/N <sub>litter</sub>      | 37.9 $\pm$ 1.6a     | 35.3 $\pm$ 0.5a     | 37.7 $\pm$ 3.3a     | 0.72     | 0.526    |
| %Lignin <sub>litter</sub>  | 27.8 $\pm$ 5.4a     | 29.1 $\pm$ 2.8a     | 29.6 $\pm$ 1.0a     | 0.04     | 0.963    |
| Lignin/N <sub>litter</sub> | 21.1 $\pm$ 4.3a     | 20.9 $\pm$ 1.7a     | 21.9 $\pm$ 0.7a     | 0.02     | 0.981    |
| %Lignin <sub>root</sub>    | 25.3 $\pm$ 2.2a     | 21.5 $\pm$ 0.2a     | 26.0 $\pm$ 4.4a     | 0.71     | 0.529    |
| Lignin/N <sub>root</sub>   | 32.7 $\pm$ 1.4a     | 30.8 $\pm$ 4.7a     | 39.7 $\pm$ 2.8a     | 2.06     | 0.209    |
| C/N <sub>root</sub>        | 77.4 $\pm$ 5.4a     | 70.2 $\pm$ 3.9a     | 73.5 $\pm$ 6.3a     | 0.47     | 0.645    |

Values designated by different letters for a given variable are significantly different among stand age classes ( $P < 0.05$ ). BA, stem basal area ( $\text{m}^2 \text{ha}^{-1}$ ); Slope, site slope; T<sub>soil10</sub>, soil temperature at 10 cm depth; Litter<sub>mass</sub>, forest floor litter mass ( $\text{g m}^{-2}$ ); Litter<sub>fall</sub>, annual litterfall ( $\text{g m}^{-2} \text{yr}^{-1}$ ); %C<sub>litter</sub>, litter carbon content in percentage; %N<sub>litter</sub>, litter nitrogen content in percentage; C/N<sub>litter</sub>, litter carbon to nitrogen ratio; %Lignin<sub>litter</sub>, litter lignin content in percentage; Lignin/N<sub>litter</sub>, litter lignin to nitrogen ratio; %Lignin<sub>root</sub>, root lignin content in percentage; Lignin/N<sub>root</sub>, root lignin to nitrogen ratio; C/N<sub>root</sub>, root carbon to nitrogen ratio.

**Table S5** Values of plant, microclimatic and soil variables for comparison among contrasting stand age classes of the *Q. aliena* forest (means  $\pm$  standard errors; n = 3).

|                     | 0 - 5 cm soil layer |                   |                   | 5 - 10 cm soil layer |                   |                   | 10 - 20 cm soil layer |                   |                   |
|---------------------|---------------------|-------------------|-------------------|----------------------|-------------------|-------------------|-----------------------|-------------------|-------------------|
|                     | 40-yrs stand        | 80-yrs stand      | 160-yrs stand     | 40-yrs stand         | 80-yrs stand      | 160-yrs stand     | 40-yrs stand          | 80-yrs stand      | 160-yrs stand     |
| FR                  | 3.7 $\pm$ 0.5a      | 2.7 $\pm$ 0.2a    | 3.8 $\pm$ 0.6a    | 2.9 $\pm$ 0.5a       | 2.8 $\pm$ 0.1a    | 3.1 $\pm$ 0.1a    | 1.5 $\pm$ 0.1a        | 1.3 $\pm$ 0.1a    | 1.2 $\pm$ 0.2a    |
| %SWC                | 41.8 $\pm$ 0.6ab    | 38.5 $\pm$ 2.7b   | 47.4 $\pm$ 2.2a   | 34.6 $\pm$ 1.1a      | 31.3 $\pm$ 2.7a   | 36.7 $\pm$ 2.6a   | 33.3 $\pm$ 1.8a       | 28.4 $\pm$ 2.3a   | 31.3 $\pm$ 0.6a   |
| %Sand               | 57.3 $\pm$ 1.8a     | 61.6 $\pm$ 3.8a   | 56.7 $\pm$ 1.5a   | 60.3 $\pm$ 5.7a      | 68.7 $\pm$ 4.5a   | 64.3 $\pm$ 1.5a   | 65.6 $\pm$ 0.3a       | 64.3 $\pm$ 0.9a   | 63.3 $\pm$ 1.2a   |
| %Silt               | 12.7 $\pm$ 1.7a     | 10.7 $\pm$ 1.7a   | 14.0 $\pm$ 0.0a   | 11.0 $\pm$ 0.0a      | 11.3 $\pm$ 2.3a   | 12.0 $\pm$ 1.0a   | 11.7 $\pm$ 0.7a       | 11.4 $\pm$ 1.5a   | 11.0 $\pm$ 1.2a   |
| %Clay               | 30.0 $\pm$ 0.6a     | 27.7 $\pm$ 2.2a   | 29.3 $\pm$ 1.5a   | 28.7 $\pm$ 5.7a      | 20.0 $\pm$ 2.3a   | 23.7 $\pm$ 0.9a   | 22.7 $\pm$ 0.9a       | 24.3 $\pm$ 2.2a   | 25.7 $\pm$ 0.3a   |
| TN <sub>soil</sub>  | 4.2 $\pm$ 0.0b      | 4.7 $\pm$ 0.1a    | 4.5 $\pm$ 0.1a    | 2.3 $\pm$ 0.3a       | 2.4 $\pm$ 0.2a    | 2.4 $\pm$ 0.1a    | 1.8 $\pm$ 0.1a        | 2.0 $\pm$ 0.1a    | 2.1 $\pm$ 0.2a    |
| NH <sub>4</sub> -N  | 51.8 $\pm$ 2.6a     | 48.5 $\pm$ 3.6a   | 59.7 $\pm$ 6.2a   | 33.7 $\pm$ 4.3a      | 31.3 $\pm$ 3.1a   | 32.6 $\pm$ 2.6a   | 27.6 $\pm$ 3.6a       | 24.4 $\pm$ 2.9a   | 24.5 $\pm$ 1.7a   |
| NO <sub>3</sub> -N  | 3.3 $\pm$ 0.3a      | 2.7 $\pm$ 0.4a    | 3.4 $\pm$ 0.4a    | 1.8 $\pm$ 0.4a       | 1.7 $\pm$ 0.6a    | 2.0 $\pm$ 0.8a    | 1.6 $\pm$ 0.2a        | 1.7 $\pm$ 0.1a    | 1.9 $\pm$ 0.1a    |
| pH                  | 4.6 $\pm$ 0.1a      | 4.6 $\pm$ 0.1a    | 4.5 $\pm$ 0.1a    | 4.5 $\pm$ 0.1a       | 4.5 $\pm$ 0.1a    | 4.4 $\pm$ 0.1a    | 4.7 $\pm$ 0.0a        | 4.6 $\pm$ 0.0a    | 4.6 $\pm$ 0.1a    |
| C/N <sub>soil</sub> | 13.6 $\pm$ 0.2a     | 13.5 $\pm$ 0.3a   | 13.4 $\pm$ 0.2a   | 13.5 $\pm$ 0.5a      | 13.9 $\pm$ 0.2a   | 13.7 $\pm$ 0.2a   | 14.4 $\pm$ 0.3a       | 13.8 $\pm$ 0.6a   | 13.6 $\pm$ 0.8a   |
| DOC                 | 164.2 $\pm$ 21.3a   | 149.0 $\pm$ 22.8a | 166.3 $\pm$ 15.6a | 168.5 $\pm$ 23.4a    | 157.7 $\pm$ 17.3a | 157.7 $\pm$ 25.5a | 166.3 $\pm$ 11.4a     | 144.7 $\pm$ 17.7a | 155.5 $\pm$ 23.4a |

Values designated by different letters for a given variable are significantly different among stand age classes within given soil layers ( $P < 0.05$ ). FR, fine root mass ( $\text{g kg}^{-1}$  soil); %SWC, gravimetric soil water content (w/w); %Sand, percentage of sand; %Silt, percentage of silt; %Clay, percentage of clay; TN<sub>soil</sub>, soil total nitrogen ( $\text{g kg}^{-1}$  soil); NH<sub>4</sub>-N, ammonium nitrogen ( $\text{mg kg}^{-1}$  soil); NO<sub>3</sub>-N, nitrate nitrogen ( $\text{mg kg}^{-1}$  soil); pH, soil pH value; C/N<sub>soil</sub>, soil carbon to nitrogen ratio; DOC, dissolved organic carbon ( $\text{mg kg}^{-1}$  soil).

**Table S6** Summary of *F*-values and significance level in repeated measures analysis of variance (RMANOVA) evaluating the effects of forest type/stand age class (between subjects) and sampling time (within subjects) on microbial biomass C (MBC), microbial biomass N (MBN), microbial C to N ratio ( $C_{mic}/N_{mic}$ ), microbial respiration (MR), and microbial metabolic quotient ( $qCO_2$ ) within given soil layers.

|          |                   | Comparison among forest types |         |                             |         |                       |        | Comparison among stand age classes of <i>Q. aliena</i> forest |       |                             |          |                       |        |
|----------|-------------------|-------------------------------|---------|-----------------------------|---------|-----------------------|--------|---------------------------------------------------------------|-------|-----------------------------|----------|-----------------------|--------|
|          |                   | Forest type ( <i>FT</i> )     |         | Sampling time ( <i>ST</i> ) |         | <i>FT</i> × <i>ST</i> |        | Stand age ( <i>SA</i> )                                       |       | Sampling time ( <i>ST</i> ) |          | <i>SA</i> × <i>ST</i> |        |
|          |                   | d.f.                          | F       | d.f.                        | F       | d.f.                  | F      | d.f.                                                          | F     | d.f.                        | F        | d.f.                  | F      |
| 0-5 cm   | MBC               | (3,8)                         | 6.91*   | (6,48)                      | 4.80**  | (18,48)               | 1.02   | (2,6)                                                         | 1.20  | (6,36)                      | 14.52*** | (12,36)               | 1.39   |
|          | MBN               | (3,8)                         | 12.27** | (6,48)                      | 7.63*** | (18,48)               | 1.75   | (2,6)                                                         | 1.55  | (6,36)                      | 4.39**   | (12,36)               | 0.55   |
|          | $C_{mic}/N_{mic}$ | (3,8)                         | 5.71*   | (6,48)                      | 5.32*** | (18,48)               | 0.62   | (2,6)                                                         | 1.24  | (6,36)                      | 4.43**   | (12,36)               | 0.87   |
|          | MR                | (3,8)                         | 1.73    | (1.71,13.69)                | 5.60*   | (5.13,13.69)          | 1.06   | (2,6)                                                         | 3.98  | (2.25,13.50)                | 15.93*** | (4.50,13.50)          | 0.72   |
|          | $qCO_2$           | (3,8)                         | 5.37*   | (6,48)                      | 1.56    | (18,48)               | 0.98   | (2,6)                                                         | 0.03  | (2.38,14.27)                | 2.92*    | (4.76,14.27)          | 1.40   |
| 5-10 cm  | MBC               | (3,8)                         | 7.72*   | (2.64,21.15)                | 6.43*** | (7.92,21.15)          | 3.98** | (2,6)                                                         | 9.15* | (6,36)                      | 7.64***  | (12,36)               | 3.16** |
|          | MBN               | (3,8)                         | 7.35*   | (6,48)                      | 1.97    | (18,48)               | 0.93   | (2,6)                                                         | 0.40  | (2.64,15.85)                | 0.55     | (5.28,15.85)          | 0.85   |
|          | $C_{mic}/N_{mic}$ | (3,8)                         | 4.81*   | (3.06,24.49)                | 1.24    | (9.18,24.49)          | 1.60   | (2,6)                                                         | 0.26  | (2.35,14.12)                | 1.07     | (4.70,14.12)          | 1.76   |
|          | MR                | (3,8)                         | 4.60*   | (2.01,16.05)                | 7.76**  | (6.03,16.05)          | 4.76** | (2,6)                                                         | 0.97  | (2.20,13.22)                | 14.73*** | (4.40,13.22)          | 1.02   |
|          | $qCO_2$           | (3,8)                         | 5.39*   | (6,48)                      | 3.32**  | (18,48)               | 2.18*  | (2,6)                                                         | 1.06  | (6,36)                      | 2.24     | (12,36)               | 1.70   |
| 10-20 cm | MBC               | (3,8)                         | 5.24*   | (2.11,16.89)                | 0.81    | (6.33,16.89)          | 1.76   | (2,6)                                                         | 1.53  | (2.37,14.20)                | 2.67*    | (4.74,14.20)          | 2.73*  |
|          | MBN               | (3,8)                         | 6.16*   | (6,48)                      | 0.78    | (18,48)               | 1.06   | (2,6)                                                         | 0.26  | (6,36)                      | 1.97     | (12,36)               | 0.57   |
|          | $C_{mic}/N_{mic}$ | (3,8)                         | 0.93    | (2.04,16.32)                | 0.51    | (6.12,16.32)          | 1.12   | (2,6)                                                         | 0.71  | (6,36)                      | 1.42     | (12,36)               | 1.67   |
|          | MR                | (3,8)                         | 9.03**  | (1.62,12.97)                | 14.94** | (4.86,12.97)          | 4.94*  | (2,6)                                                         | 0.55  | (6,36)                      | 3.47**   | (12,36)               | 0.35   |
|          | $qCO_2$           | (3,8)                         | 4.38*   | (6,48)                      | 3.15*   | (18,48)               | 1.71   | (2,6)                                                         | 0.48  | (2.75,16.48)                | 3.01     | (5.50,16.48)          | 1.75   |

Note: Greenhouse-Geisser correction was applied when the sphericity assumption was violated. \* $P < 0.05$ ; \*\* $P < 0.01$ ; \*\*\*  $P < 0.001$ .

**Table S7** Summary of *F*-values and significance level in RMANOVA evaluating the effects of forest type/stand age class (between subjects) and sampling time (within subjects) on total activities of  $\beta$ -1,4-glucosidase (BG),  $\beta$ -1,4-N-acetylglucosaminidase (NAG), phenol oxidase (PO) and peroxidase (PER) within given soil layers.

|          |     | Comparison among forest types |        |                             |          |                       |       | Comparison among stand age classes of <i>Q. aliena</i> forest |       |                             |         |                       |      |
|----------|-----|-------------------------------|--------|-----------------------------|----------|-----------------------|-------|---------------------------------------------------------------|-------|-----------------------------|---------|-----------------------|------|
|          |     | Forest type ( <i>FT</i> )     |        | Sampling time ( <i>ST</i> ) |          | <i>FT</i> × <i>ST</i> |       | Stand age ( <i>SA</i> )                                       |       | Sampling time ( <i>ST</i> ) |         | <i>SA</i> × <i>ST</i> |      |
|          |     | d.f.                          | F      | d.f.                        | F        | d.f.                  | F     | d.f.                                                          | F     | d.f.                        | F       | d.f.                  | F    |
| 0-5 cm   | BG  | (3,8)                         | 9.03** | (6,48)                      | 1.75     | (18,48)               | 1.32  | (2,6)                                                         | 4.73  | (6,36)                      | 2.06    | (12,36)               | 0.92 |
|          | NAG | (3,8)                         | 4.30*  | (2.30,18.43)                | 5.81**   | (6.90,18.43)          | 2.70* | (2,6)                                                         | 2.74  | (6,36)                      | 5.44*** | (12,36)               | 1.23 |
|          | PO  | (3,8)                         | 3.46   | (3.16,25.27)                | 8.98***  | (9.48,25.27)          | 2.15  | (2,6)                                                         | 1.06  | (6,36)                      | 6.88*** | (12,36)               | 1.13 |
|          | PER | (3,8)                         | 2.09   | (2.27,18.12)                | 4.34*    | (6.80,18.12)          | 0.90  | (2,6)                                                         | 0.03  | (2.50,14.98)                | 7.55**  | (5.00,14.98)          | 0.16 |
| 5-10 cm  | BG  | (3,8)                         | 4.75*  | (6,48)                      | 8.13***  | (18,48)               | 0.72  | (2,6)                                                         | 1.34  | (1.91,11.47)                | 5.84*   | (3.82,11.47)          | 0.39 |
|          | NAG | (3,8)                         | 0.93   | (1.75,14.01)                | 2.66     | (5.25,14.01)          | 0.66  | (2,6)                                                         | 2.15  | (1.49,8.93)                 | 1.58    | (2.98,8.93)           | 1.15 |
|          | PO  | (3,8)                         | 4.37*  | (2.76,22.07)                | 36.71*** | (8.28,22.07)          | 2.76* | (2,6)                                                         | 2.45  | (1.93,11.57)                | 5.16*   | (3.86,11.57)          | 1.73 |
|          | PER | (3,8)                         | 5.74*  | (2.30,18.40)                | 2.65*    | (6.90,18.40)          | 0.56  | (2,6)                                                         | 5.69* | (1.96,11.75)                | 4.34    | (3.92,11.75)          | 0.41 |
| 10-20 cm | BG  | (3,8)                         | 5.46*  | (6,48)                      | 12.20*** | (18,48)               | 1.78  | (2,6)                                                         | 0.12  | (1.00,6.01)                 | 0.81    | (2.00,6.01)           | 0.99 |
|          | NAG | (3,8)                         | 4.31*  | (1.69,13.53)                | 6.12*    | (5.07,13.53)          | 1.70  | (2,6)                                                         | 0.19  | (1.49,8.94)                 | 1.82    | (2.98,8.94)           | 0.54 |
|          | PO  | (3,8)                         | 4.27*  | (2.73,21.84)                | 4.39*    | (8.19,21.84)          | 2.43* | (2,6)                                                         | 1.69  | (2.15,12.89)                | 6.90**  | (4.30,12.89)          | 0.29 |
|          | PER | (3,8)                         | 4.45*  | (2.87,22.98)                | 1.45     | (8.61,22.98)          | 1.45  | (2,6)                                                         | 2.90  | (2.09,12.56)                | 1.99    | (4.18,12.56)          | 0.89 |

Note: Greenhouse-Geisser correction was applied when the sphericity assumption was violated. \* $P < 0.05$ ; \*\* $P < 0.01$ ; \*\*\*  $P < 0.001$ .



**Table S8** Summary of *F*-values and significance level in RMANOVA evaluating the effects of forest type/stand age class (between subjects) and sampling time (within subjects) on microbial biomass-specific activities of  $\beta$ -1,4-glucosidase (BG),  $\beta$ -1,4-N-acetylglucosaminidase (NAG), phenol oxidase (PO) and peroxidase (PER) within given soil layers.

|          |     | Comparison among forest types |         |                             |         |                       |        | Comparison among stand age classes of <i>Q. aliena</i> forest |      |                             |          |                       |      |
|----------|-----|-------------------------------|---------|-----------------------------|---------|-----------------------|--------|---------------------------------------------------------------|------|-----------------------------|----------|-----------------------|------|
|          |     | Forest type ( <i>FT</i> )     |         | Sampling time ( <i>ST</i> ) |         | <i>FT</i> × <i>ST</i> |        | Stand age ( <i>SA</i> )                                       |      | Sampling time ( <i>ST</i> ) |          | <i>SA</i> × <i>ST</i> |      |
|          |     | d.f.                          | F       | d.f.                        | F       | d.f.                  | F      | d.f.                                                          | F    | d.f.                        | F        | d.f.                  | F    |
| 0-5 cm   | BG  | (3,8)                         | 8.01**  | (2.75,22.00)                | 4.99*   | (8.25,22.00)          | 0.75   | (2,6)                                                         | 0.76 | (6,36)                      | 4.11**   | (12,36)               | 0.77 |
|          | NAG | (3,8)                         | 4.54*   | (6,48)                      | 6.29*** | (18,48)               | 2.55** | (2,6)                                                         | 0.26 | (1.83,10.97)                | 4.33*    | (3.66,10.97)          | 0.99 |
|          | PO  | (3,8)                         | 15.38** | (6,48)                      | 4.32**  | (18,48)               | 1.11   | (2,6)                                                         | 2.17 | (6,36)                      | 10.67*** | (12,36)               | 1.22 |
|          | PER | (3,8)                         | 16.32** | (6,48)                      | 4.19**  | (18,48)               | 0.89   | (2,6)                                                         | 0.27 | (6,36)                      | 8.10***  | (12,36)               | 0.38 |
| 5-10 cm  | BG  | (3,8)                         | 4.74*   | (3.38,27.04)                | 7.47**  | (10.14,27.04)         | 1.83   | (2,6)                                                         | 0.15 | (6,36)                      | 9.16***  | (12,36)               | 0.97 |
|          | NAG | (3,8)                         | 1.05    | (1.29,10.35)                | 2.63    | (3.87,10.35)          | 0.48   | (2,6)                                                         | 3.17 | (6,36)                      | 2.93*    | (12,36)               | 1.55 |
|          | PO  | (3,8)                         | 10.17** | (1.69,13.48)                | 2.85    | (5.07,13.48)          | 2.79   | (2,6)                                                         | 1.15 | (6,36)                      | 3.25*    | (12,36)               | 1.57 |
|          | PER | (3,8)                         | 17.65** | (1.44,11.53)                | 2.28    | (4.32,11.53)          | 1.22   | (2,6)                                                         | 1.09 | (6,36)                      | 6.25***  | (12,36)               | 1.00 |
| 10-20 cm | BG  | (3,8)                         | 4.23*   | (6,48)                      | 6.62*** | (18,48)               | 1.31   | (2,6)                                                         | 0.11 | (1.00,6.03)                 | 0.74     | (2.00,6.03)           | 0.98 |
|          | NAG | (3,8)                         | 1.21    | (6,48)                      | 6.14*** | (18,48)               | 2.32*  | (2,6)                                                         | 0.35 | (1.62,9.71)                 | 3.33     | (3.24,9.71)           | 1.08 |
|          | PO  | (3,8)                         | 4.22*   | (2.36,18.89)                | 4.31*   | (7.08,18.89)          | 2.59*  | (2,6)                                                         | 0.71 | (1.52,9.10)                 | 2.85     | (3.04,9.10)           | 0.57 |
|          | PER | (3,8)                         | 8.83**  | (2.63,21.03)                | 0.79    | (7.89,21.03)          | 0.86   | (2,6)                                                         | 1.48 | (1.96,11.75)                | 2.08     | (3.92,11.75)          | 1.08 |

Note: Greenhouse-Geisser correction was applied when the sphericity assumption was violated. \**P* < 0.05; \*\**P* < 0.01; \*\*\* *P* < 0.001.
